# Supplementary material for: Increased ETV4 expression correlates with estrogen-enhanced proliferation and invasiveness of cholangiocarcinoma cells
Source: PubMed Central journal article supplement (PMC5819217; doi:10.1186/s12935-018-0525-z), 2018-02-20
Supplement: 12935_2018_525_MOESM1_ESM.pdf [file 12935_2018_525_MOESM1_ESM.pdf]

**Table S1** Primer sequences for gene expression analysis of ERs

| Gene                         | Accession no. |   | Primer sequence (5' → 3') | Size (bp) |
|------------------------------|---------------|---|---------------------------|-----------|
| <i>ER<math>\alpha</math></i> | NM_000125.3   | F | GAATCTGCCAAGGAGACTCGC     | 151       |
|                              |               | R | ACTGGTTGGTGGCTGGACAC      |           |
| <i>ER<math>\beta</math></i>  | NM_001437.2   | F | TGTCTGCAGCGATTACGCA       | 145       |
|                              |               | R | GCGCCGGTTTTTTATCGATT      |           |
| <i>36B4</i>                  | NM_001002.3   | F | CTTCCCACTTGCTGAAAAG       | 168       |
|                              |               | R | CCAAATCCCATATCCTCGT       |           |

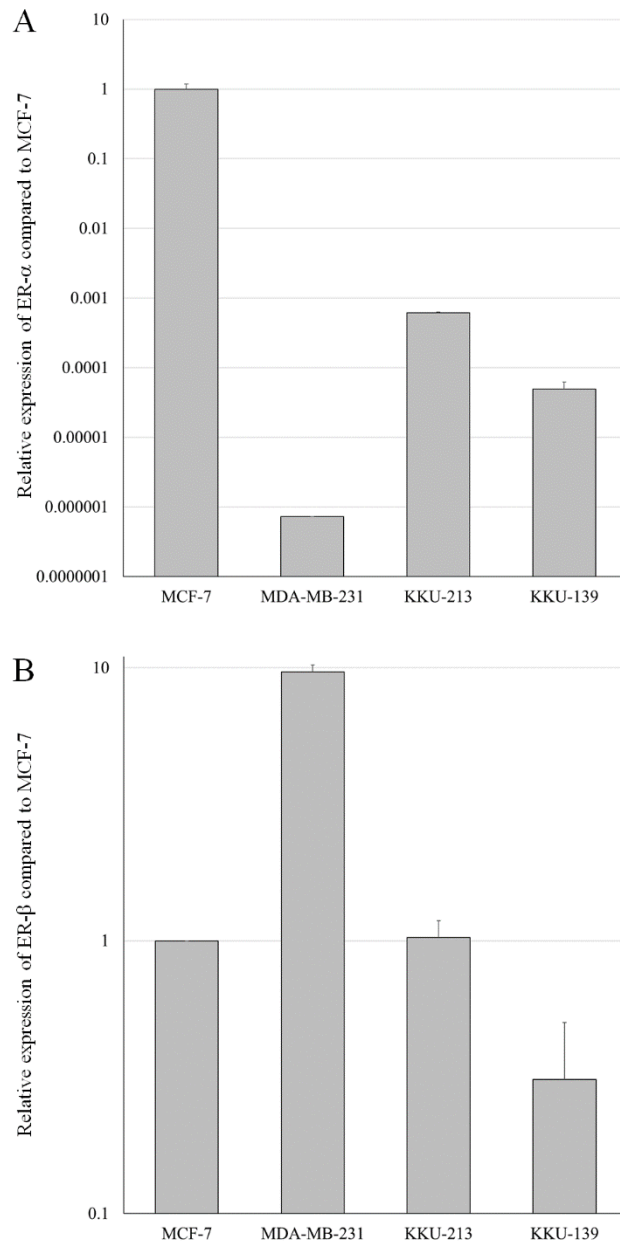

**Figure S1** Relative expression of ERs in CCA cells compared to MCF-7 and MDA-MB-231 breast cancer cells: (A) ER- $\alpha$ ; (B) ER- $\beta$ .

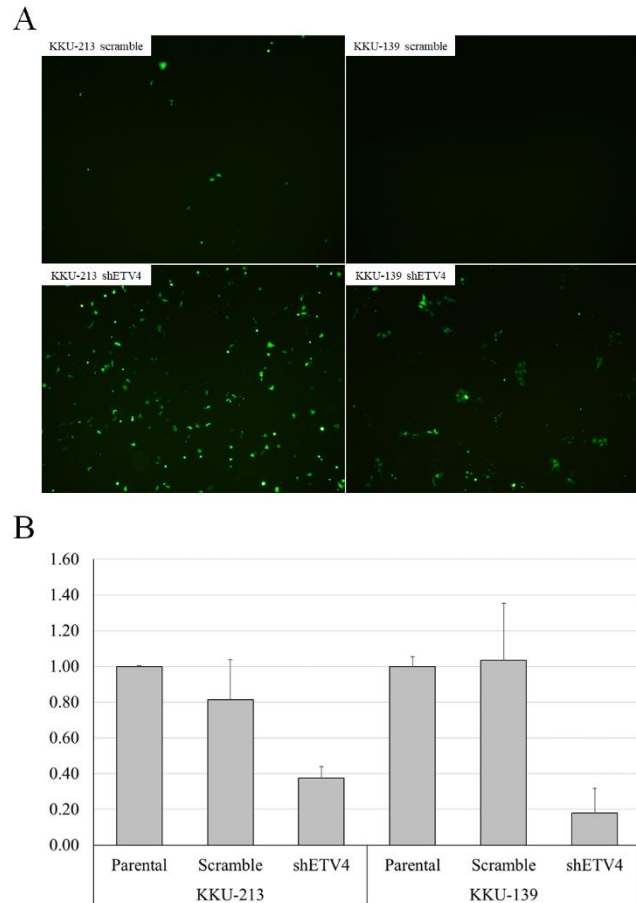

**Figure S2** Efficacy of shETV4 plasmid transfection and knockdown: (A) Transfection efficacy determined by expression of GFP and visualized under fluorescence inverted microscope with 40x original magnification, cell type and conditions were labelled in the picture; (B) Knockdown efficacy in transfected cells determined by RT-real time PCR and compared to parental cell mRNA.
